# Supplementary material
Source: PubMed Central journal article supplement (PMC6548644)
Supplement: NIHMS1527923-supplement-1.pdf [file NIHMS1527923-supplement-1.pdf]

**Supplementary Table S1: Antibodies**

| <b>Antigen</b>                                          | <b>Conjugate</b> | <b>Catalog #</b> | <b>Manufacturer</b>         | <b>Method</b>      | <b>Dilution</b>  |
|---------------------------------------------------------|------------------|------------------|-----------------------------|--------------------|------------------|
| <b>CD45</b>                                             | AlexaFluor488    | 103122           | BioLegend                   | FC                 | 1:500            |
| <b>CD3</b>                                              | AlexaFluor594    | 100240           | BioLegend                   | FC                 | 1:1000           |
| <b>CD8a</b>                                             | PE/Cy7           | 100721           | BioLegend                   | FC                 | 1:1000           |
| <b>CD49b</b>                                            | Pacific Blue     | 108917           | BioLegend                   | FC                 | 1:500            |
| <b>CD4</b>                                              | PE               | 100408           | BioLegend                   | FC                 | 1:1000           |
| <b>Granzyme B</b>                                       | AlexaFluor647    | 515405           | BioLegend                   | FC                 | 1:250            |
| <b>mouse IgG1, <math>\kappa</math></b>                  | AlexaFluor647    | 400135           | BioLegend                   | FC                 | 1:500            |
| <b>FoxP3</b>                                            | PerCP/Cy5.5      | 563902           | BD Biosc.                   | FC                 | 1:100            |
| <b>rat IgG2<math>\alpha</math>, <math>\kappa</math></b> | PerCP/Cy5.5      | 400531           | BioLegend                   | FC                 | 1:100            |
| <b>pTBK1 (Ser172)</b>                                   | PE               | 13498            | CST                         | FC                 | 1:200            |
| <b>rabbit IgG</b>                                       | PE               | 5742S            | CST                         | FC                 | 1:50             |
| <b>pIRF3 (Ser396)</b>                                   | AlexaFluor647    | 10327S           | CST                         | FC                 | 1:100            |
| <b>rabbit IgG</b>                                       | AlexaFluor647    | 2985S            | CST                         | FC                 | 1:800            |
| <b>CD11b</b>                                            | BV711            | 101241           | BioLegend                   | FC                 | 1:1000           |
| <b>CD11c</b>                                            | BV650            | 564079           | BD Biosc.                   | FC                 | 1:500            |
| <b>MHC II (I-A/I-E)</b>                                 | BV421            | 107631           | BioLegend                   | FC                 | 1:1000           |
| <b>Ep-CAM (CD326)</b>                                   | BV605            | 118227           | BioLegend                   | FC                 | 1:500            |
| <b>p-histone H2A.X (Ser139)</b>                         | AlexaFluor647    | 613408           | BioLegend                   | FC                 | 1:100            |
| <b>pIRF3 (Ser396)</b>                                   | -                | 29047            | CST                         | Indirect<br>FC, IF | 1:200,<br>1:100  |
| <b>Normal rabbit IgG</b>                                | -                | 2729             | CST                         | Indirect<br>FC     | 1:500            |
| <b>cGAS</b>                                             | -                | SC-515777        | Santa Cruz<br>Biotechnology | IF                 | 1:100            |
| <b>p-histone H2A.X (Ser139)</b>                         | -                | JBW301           | EMD Millipore               | IF                 | 1:500            |
| <b>rabbit IgG (H+L)</b>                                 | AlexaFluor568    | A11011           | Invitrogen                  | Indirect<br>FC, IF | 1:200,<br>1:2000 |
| <b>mouse IgG (H+L)</b>                                  | AlexaFluor488    | A11001           | Invitrogen                  | IF                 | 1:2000           |
| <b>TBK1/NAK</b>                                         | -                | 3504S            | CST                         | WB                 | 1:1000           |
| <b>cGAS</b>                                             | -                | 31659S           | CST                         | WB                 | 1:1000           |
| <b>STING</b>                                            | -                | NBP224683        | IMGENEX                     | WB                 | 1:1000           |
| <b>BRCA1</b>                                            | -                | GTX70111         | GeneTex, Inc                | WB                 | 1:1000           |
| <b><math>\beta</math>-Actin</b>                         | -                | A00702-200       | GenScript                   | WB                 | 1:10000          |
| <b>Vinculin</b>                                         | -                | 4650S            | CST                         | WB                 | 1:1000           |
| <b>rabbit IgG</b>                                       | HRP              | NA934            | GE Healthcare               | WB                 | 1:2000           |
| <b>mouse IgG</b>                                        | HRP              | NA931            | GE Healthcare               | WB                 | 1:2000           |

FC, flow cytometry; WB, western blotting; IHC, immunohistochemistry; CST, Cell Signaling Technology; BD Biosc., BD Biosciences
