# Supplementary material
Source: PubMed Central journal article supplement (PMC6548644)
Supplement: NIHMS1527923-supplement-4.pdf [file NIHMS1527923-supplement-4.pdf]

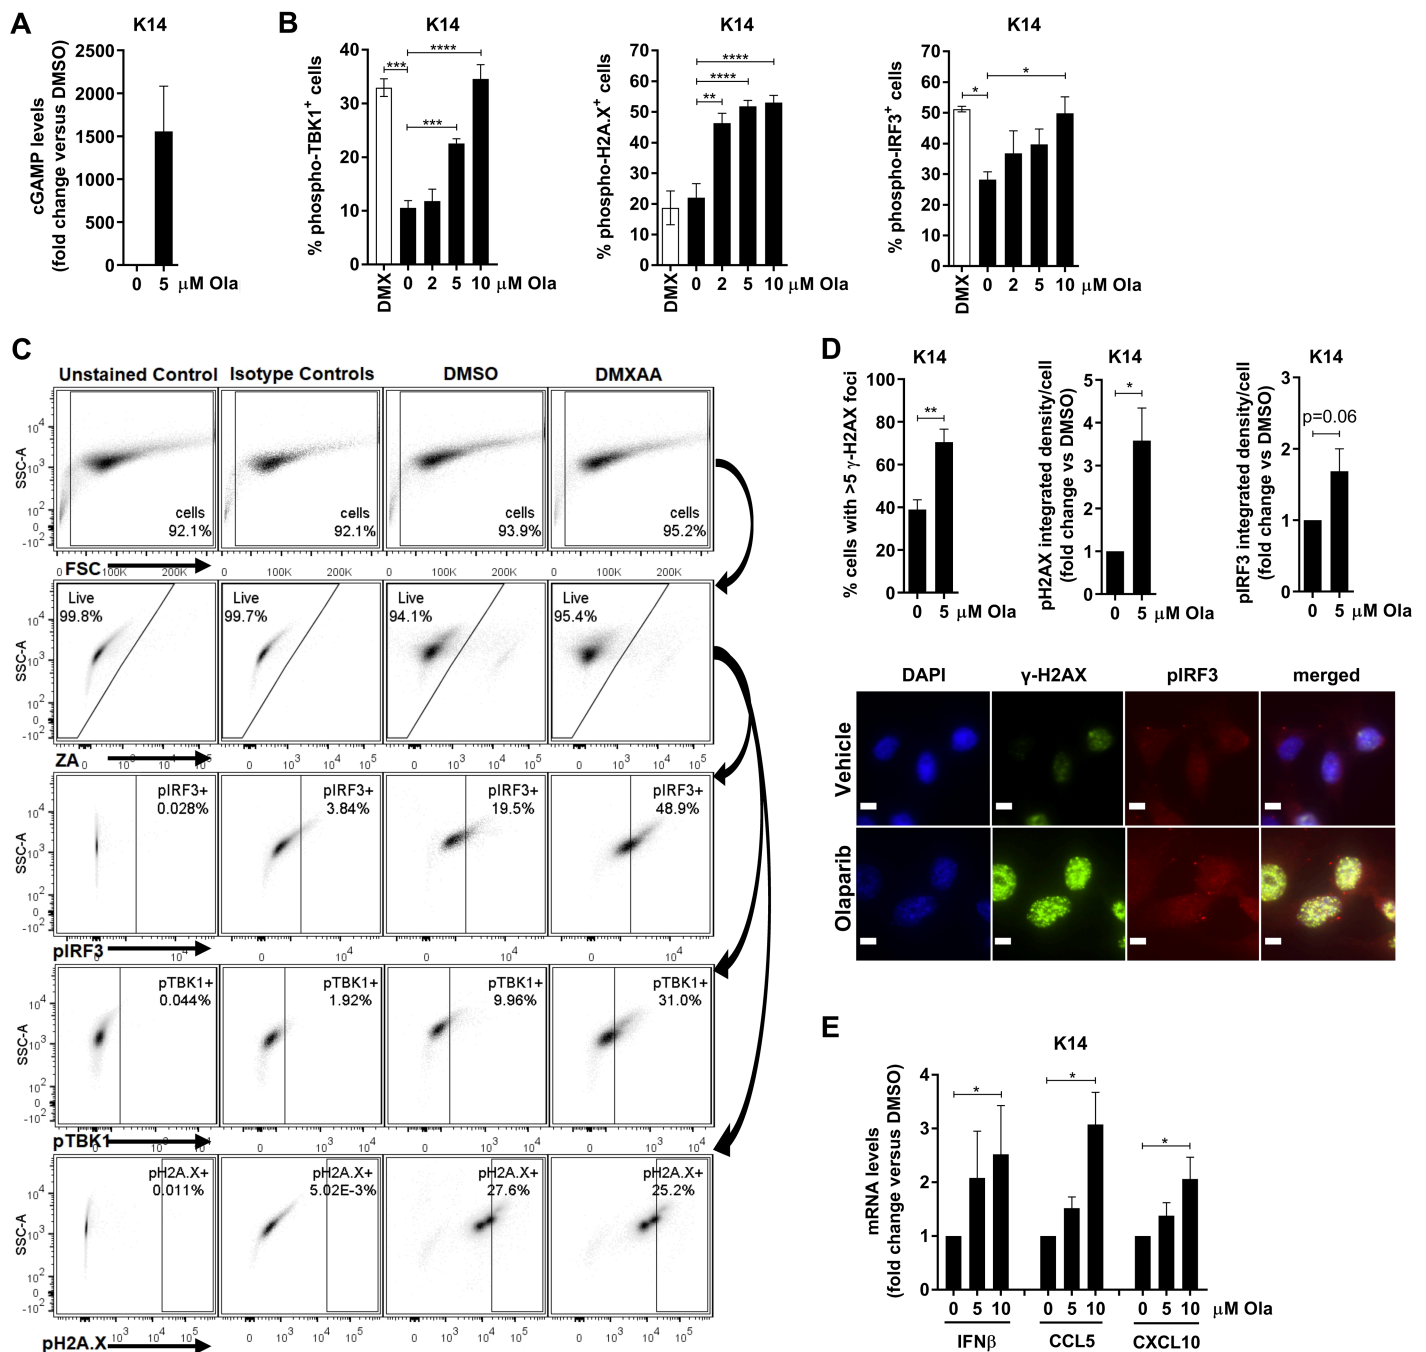

### Supplementary Figure S3

(A) The murine K14-Cre BRCA1<sup>fl/fl</sup>p53<sup>fl/fl</sup> cell line (K14) was treated with DMSO (0  $\mu$ M) or the indicated doses of olaparib for 72h and subjected to ELISA for cGAMP production. Error bars represent SEM of 3 independent experiments. (B) K14 cells were treated with the indicated doses of Olaparib for 72h and subjected to flow cytometric analysis of pTBK1<sup>Ser172</sup>, pIRF3<sup>Ser396</sup> and pH2AX<sup>Ser139</sup> expression. DMXAA (10  $\mu$ M, 24h) was used as a positive control. Error bars represent SEM of 2-4 independent experiments. Statistical analyses were performed using one-way ANOVA with Sidak's post-hoc test. (C) Gating strategy used in flow cytometric analysis of pIRF3, pTBK1 and pH2AX in cell lines. Debris was excluded and zombie-aqua positive i.e. non-viable cells were gated out. Live cells were analyzed for pIRF3, pTBK1 and pH2AX expression. The examples shown are from unstained control, isotype controls, vehicle- and DMXAA-treated K14 cells. (D) K14 cells were treated with 0 or 5  $\mu$ M olaparib for 24h and subjected to immunofluorescence staining for pH2AX and pIRF3. The number of cells displaying >5  $\gamma$ -H2AX foci was quantified, and statistical analysis was performed using unpaired t-test. pIRF3 and pH2AX corrected integrated density/cell was expressed as fold change versus DMSO. Statistical analyses were performed using one-sample t-test. Error bars represent SEM of 3 independent experiments. Representative images of DAPI (blue),  $\gamma$ -H2AX (green) and pIRF3 (red) stained cells are shown (20x magnification) on the bottom panel. Scale bar, 8  $\mu$ m. (E) K14 cells were treated with the indicated doses of olaparib for 72h and analyzed for mRNA expression of IFN $\beta$ , CCL5 and CXCL10 (normalized to GAPDH internal control). Error bars represent SEM of 4 independent experiments. Statistical analysis was performed using Kruskal-Wallis test Dunn's post-hoc test.
