# Supplementary material
Source: PubMed Central journal article supplement (PMC6548644)
Supplement: NIHMS1527923-supplement-5.pdf [file NIHMS1527923-supplement-5.pdf]

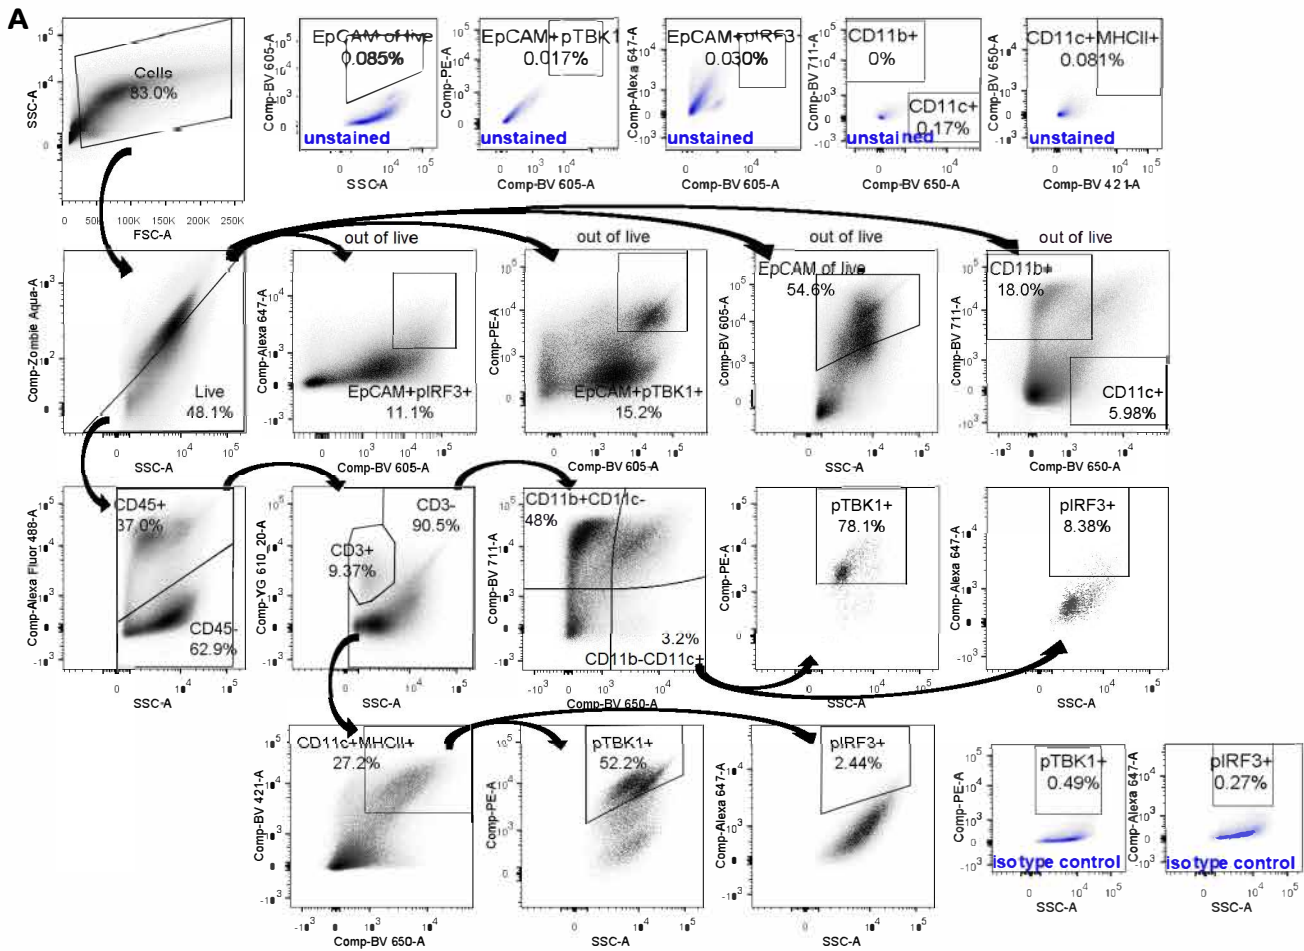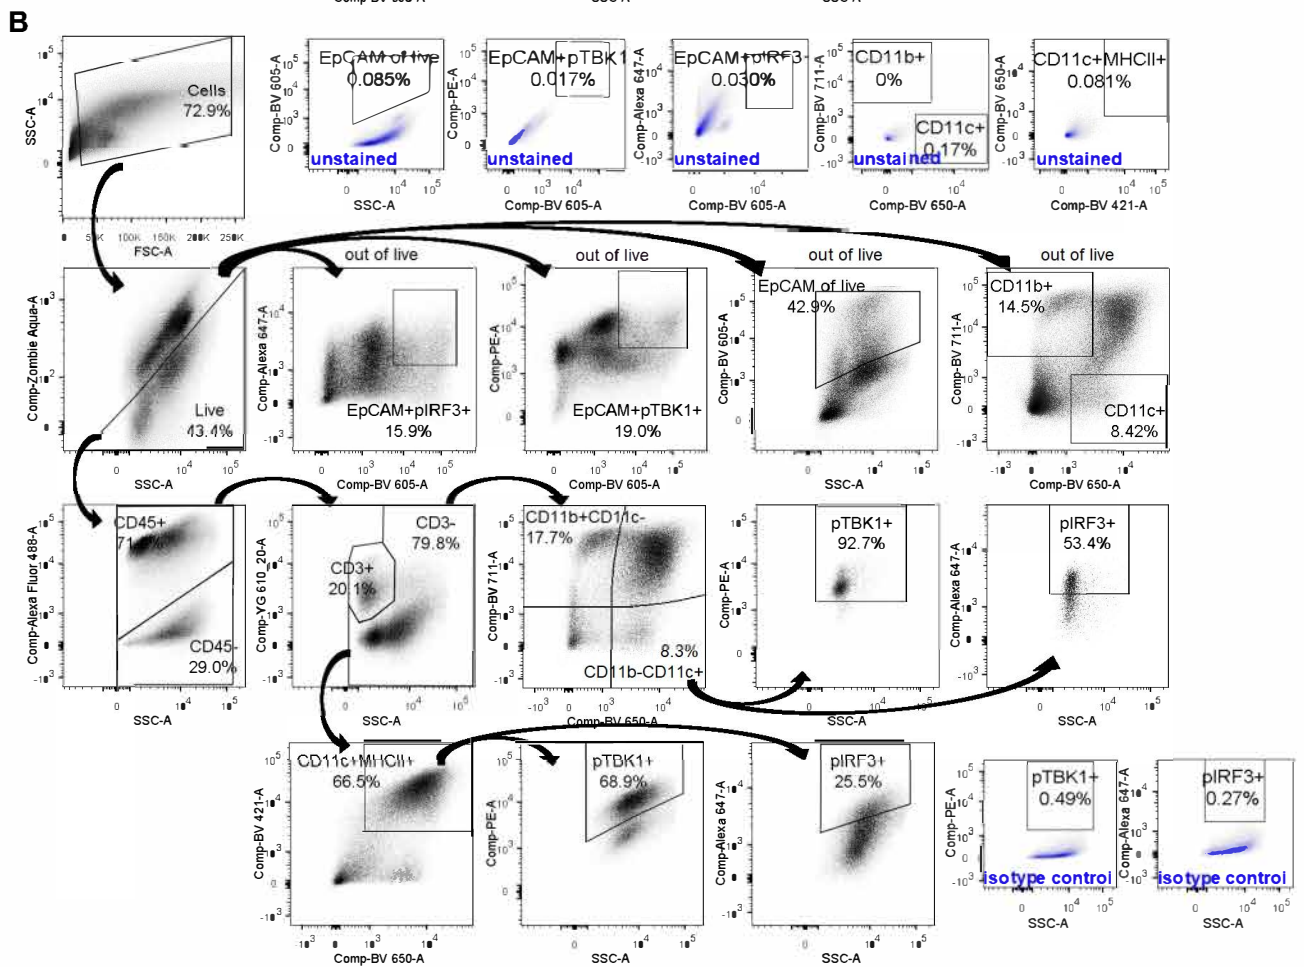

#### **Supplementary Figure S4**

Gating strategy used in flow cytometric analysis of pTBK1 and pIRF3 from harvested tumors. Debris was excluded on SSC vs FSC plot and zombie aqua-positive i.e. non-viable cells were gated out. Live cells were analyzed for expression of CD45, CD3, EpCAM, CD11B, CD11C, MHCII, pTBK1 and pIRF3. pTBK1- or pIRF3-positive tumor cells were defined from EpCAM (epithelial) and pTBK1 or pIRF3 double positive live cells. For DC identification, CD45<sup>+</sup> live cells were gated on a CD3 vs SSC plot and CD3<sup>-</sup> i.e. non-T cells were analyzed for expression of CD11B, CD11C and MHCII markers. CD11B<sup>-</sup>CD11C<sup>+</sup> (pure) and CD11C<sup>+</sup>MHCII<sup>+</sup> (mature) DCs were then analyzed for expression of pTBK1 and pIRF3. Representative black-colored density plots are shown for (A) vehicle-treated or (B) olaparib-treated stained samples. Blue-colored density plots are from isotype and unstained controls, as indicated on the plot.
